# Supplementary material for: Non-Native Marine Macroalgae of the Azores: An Updated Inventory
Source: MDPI journal article supplement (doi:10.3390/d15101089), 2023-10-17

# Ochrophyta

*Hydroclathrus tilesii*

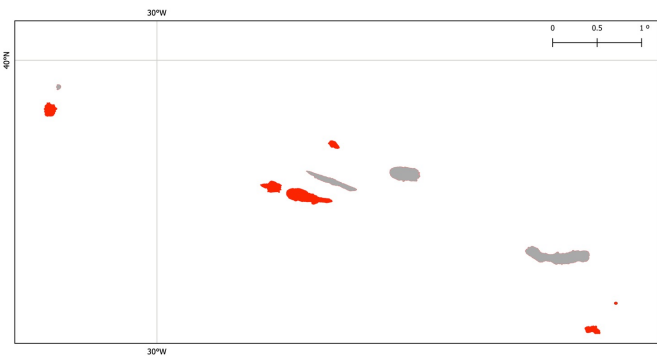

*Papenfussiella kuromo*

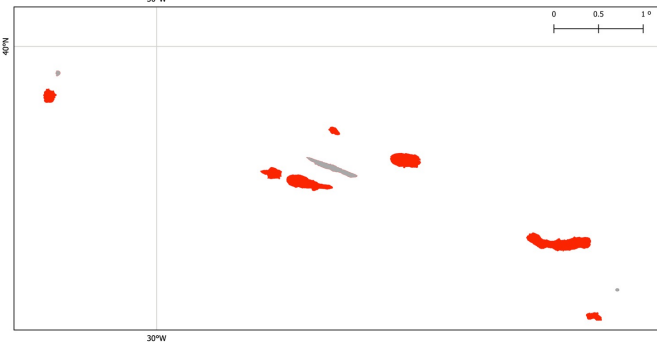

*Petalonia binghamiae*

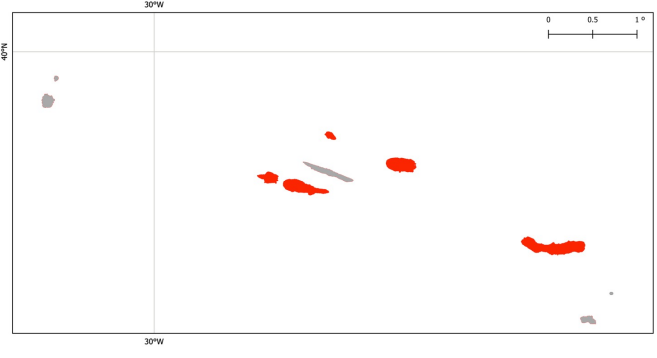

*Rugulopteryx okamurae*

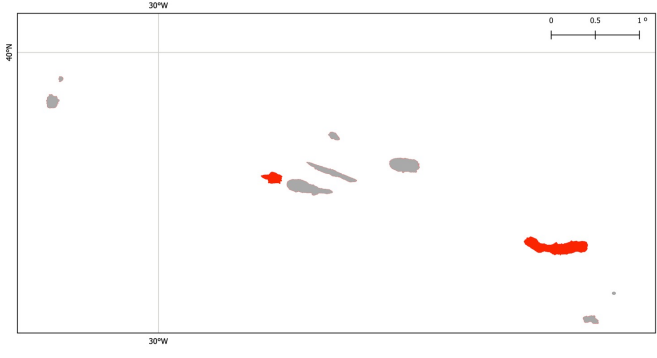

*Scytosiphon dotyi*

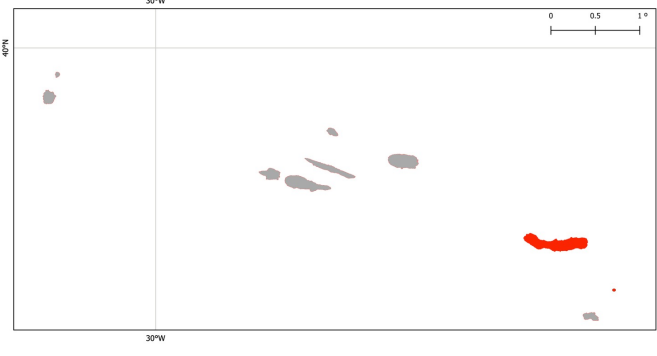

# Rhodophyta

*Acrothamnion preissii*

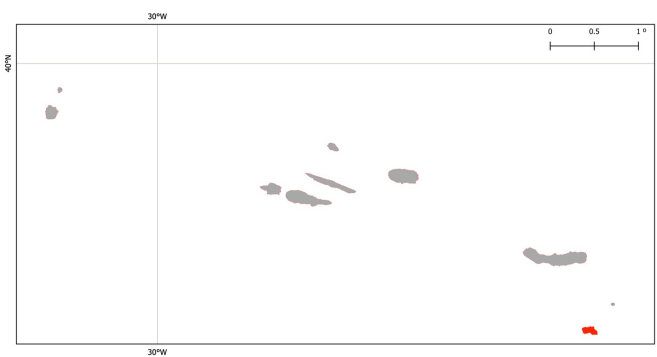

*Aglaothamnion cordatum*

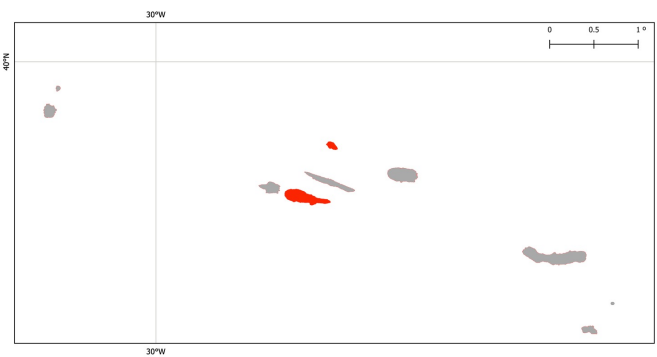

# Rhodophyta

*Antithamnion densum*

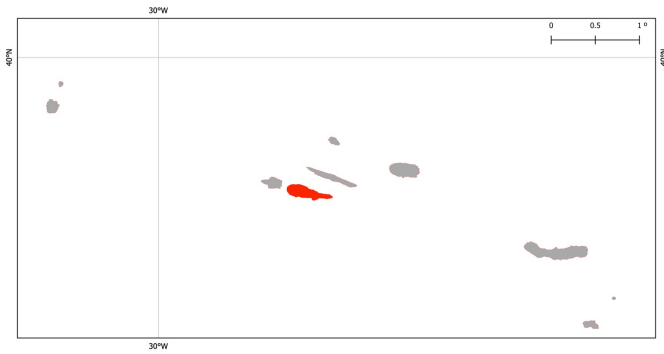

*Antithamnion diminuatum*

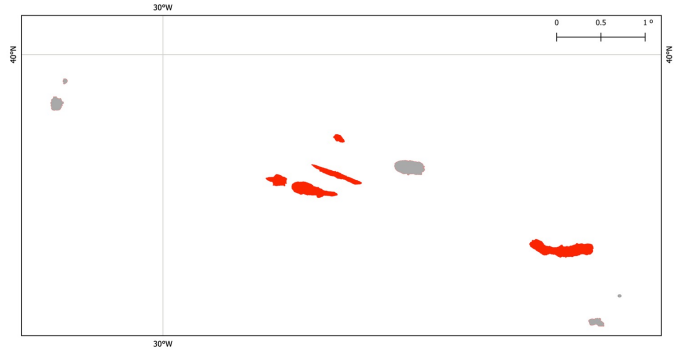

*Antithamnion hubbsii*

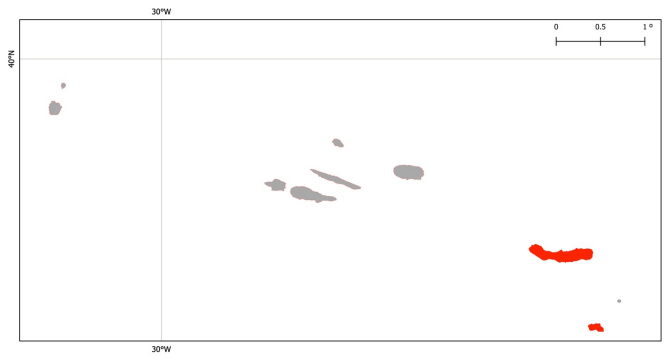

*Antithamnion nipponicum*

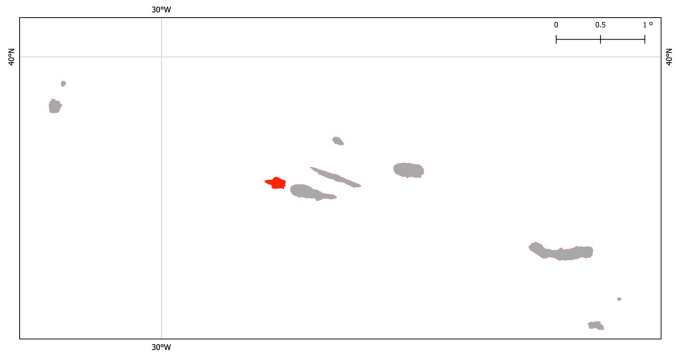

*Antithamnionella elegans*

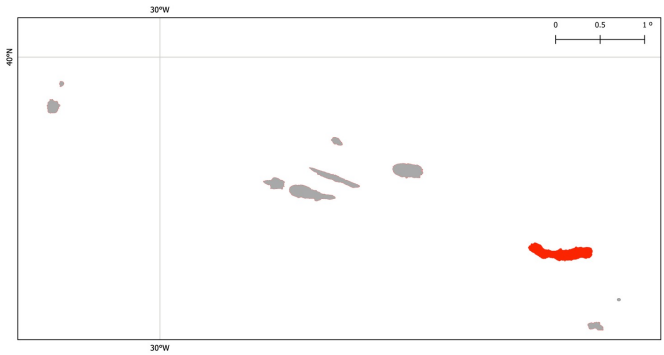

*Antithamnionella spirographidis*

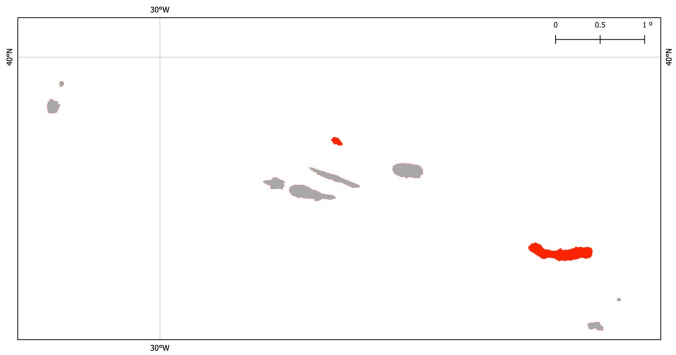

*Antithamnionella ternifolia*

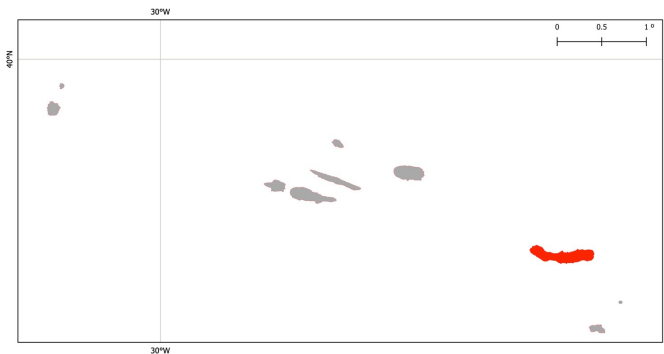

*Asparagopsis armata*

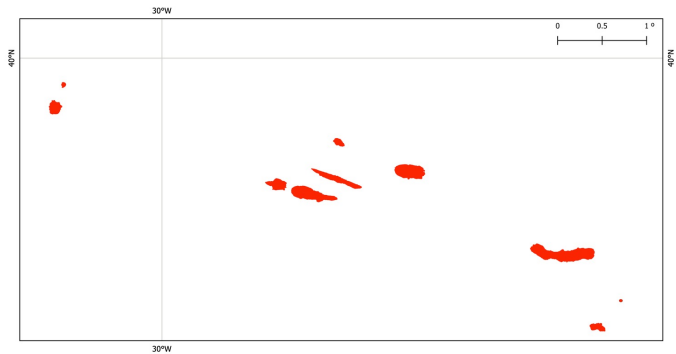

# Rhodophyta

*Asparagopsis taxiformis*

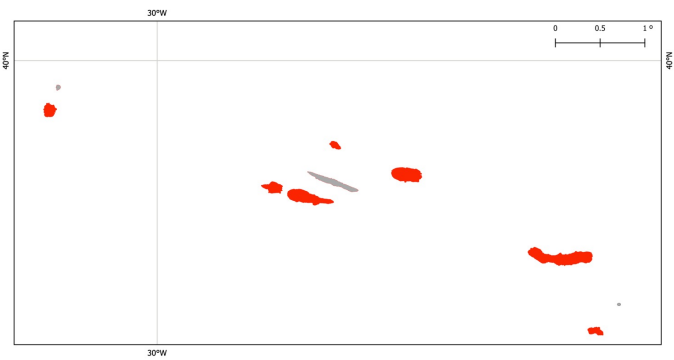

*Bonnemaisonia hamifera*

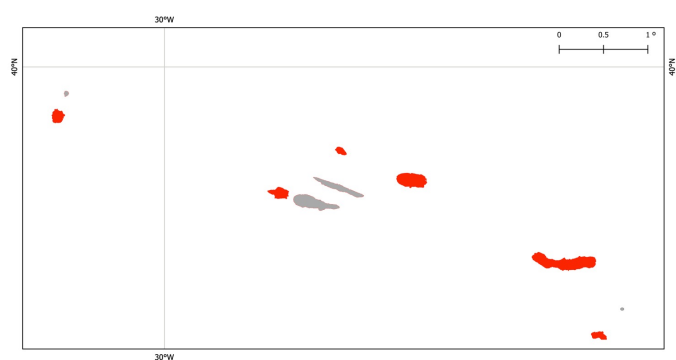

*Ceramium cingulatum*

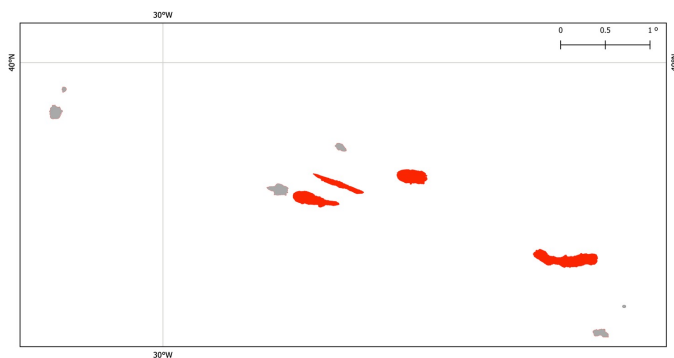

*Corynomorpha prismatica*

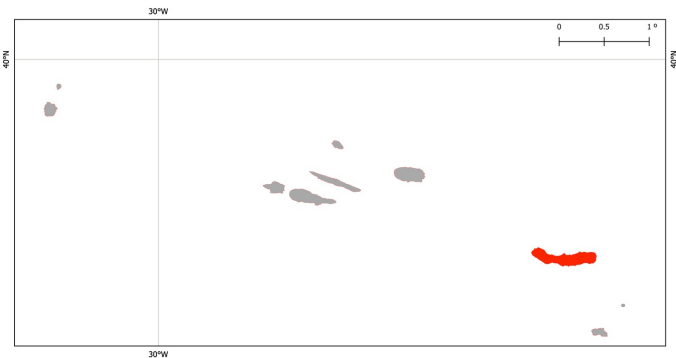

*Grallatoria reptans*

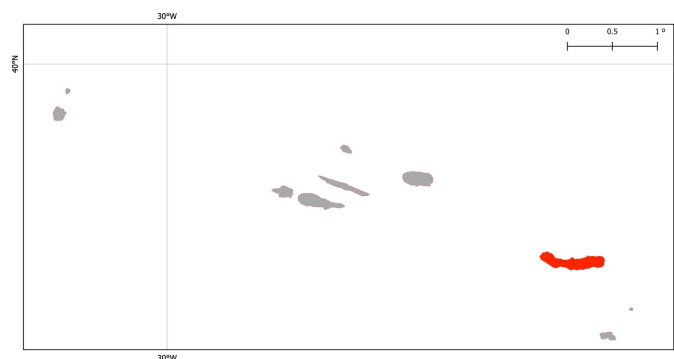

*Grateloupia turuturu*

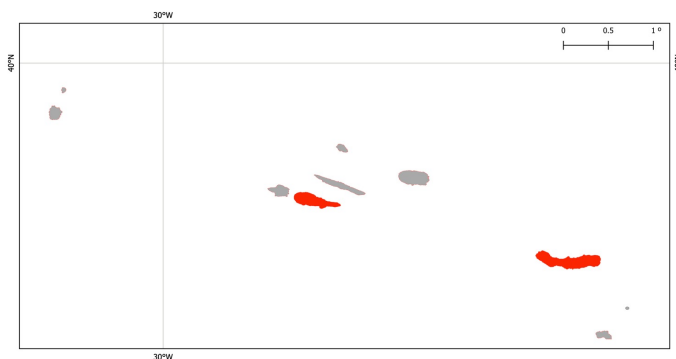

*Gymnophycus hapsiphorus*

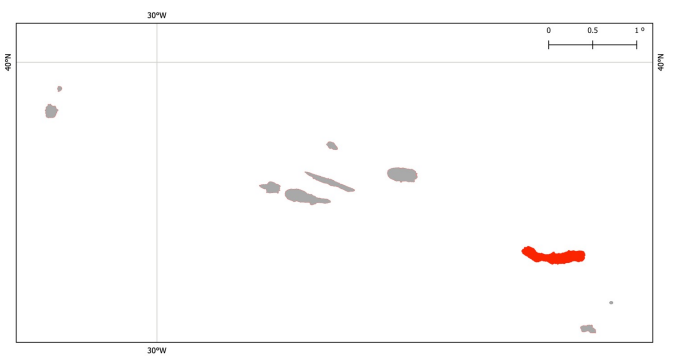

*Hypnea flagelliformis*

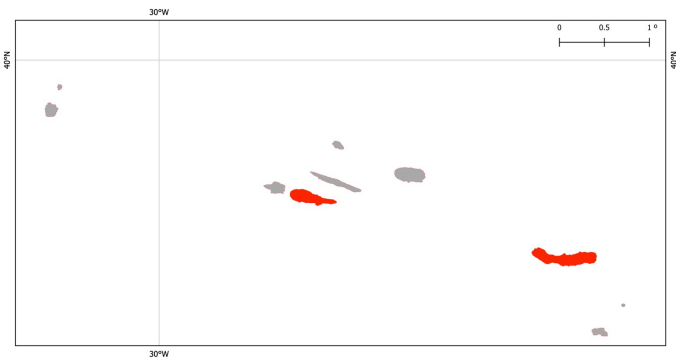

# Rhodophyta

*Hypoglossum heterocystideum*

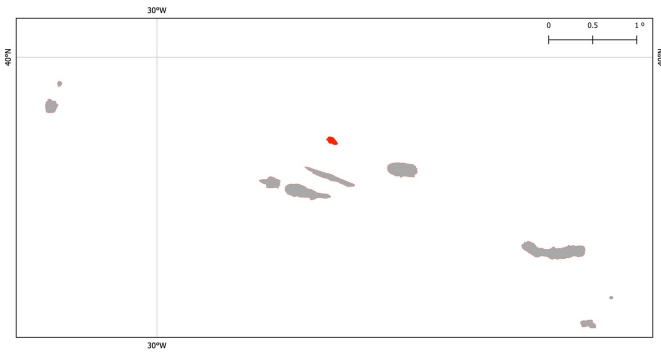

*Laurencia brongniartii*

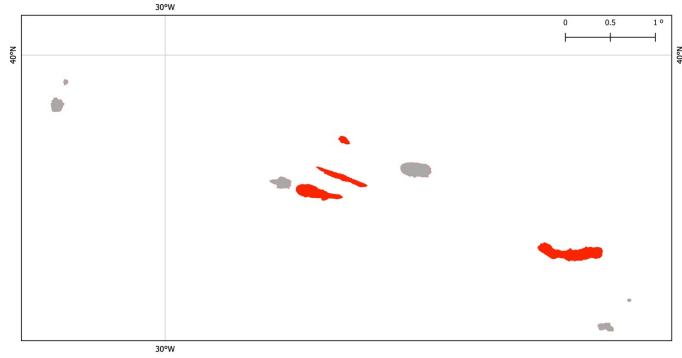

*Laurencia chondrioides*

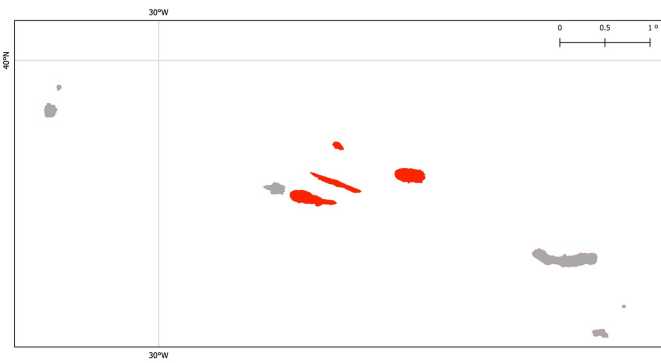

*Laurencia dendroidea*

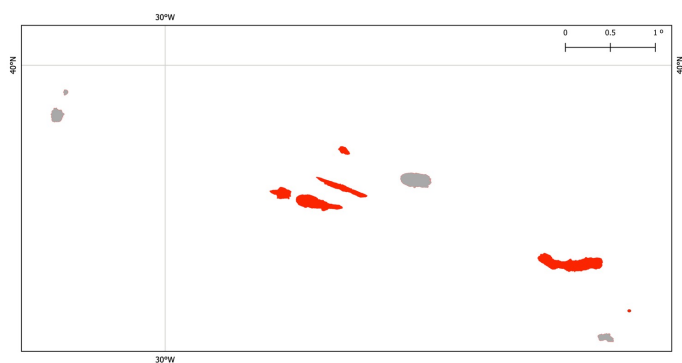

*Laurencia minuta*

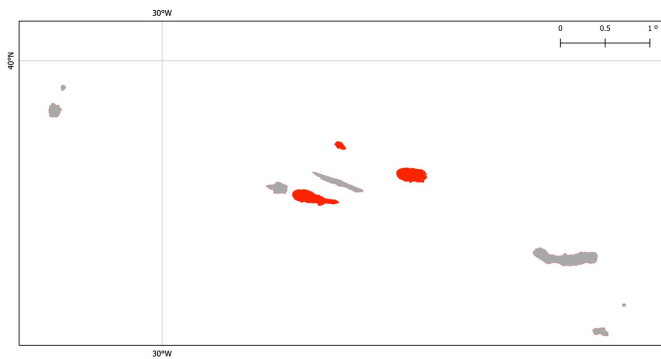

*Lophocladia trichoclados*

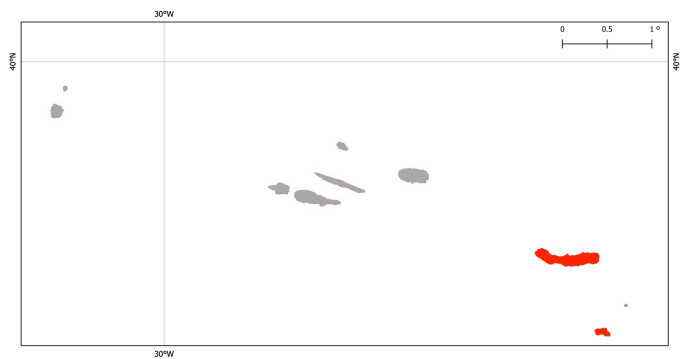

*Melanothamnus harveyi*

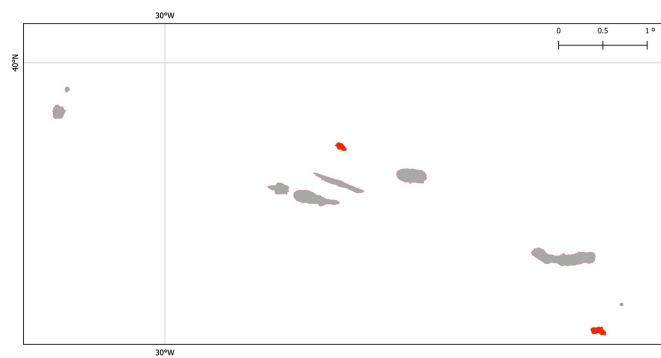

*Melanothamnus sphaerocarpus*

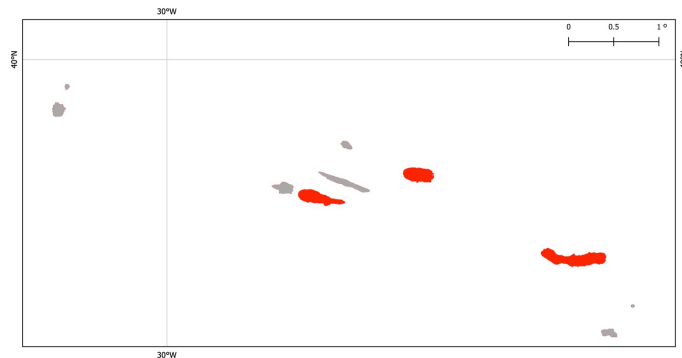

# Rhodophyta

*Neozizziella divaricata*

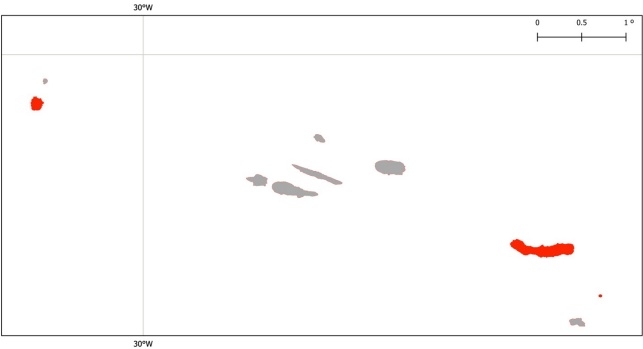

*Scageliopsis patens*

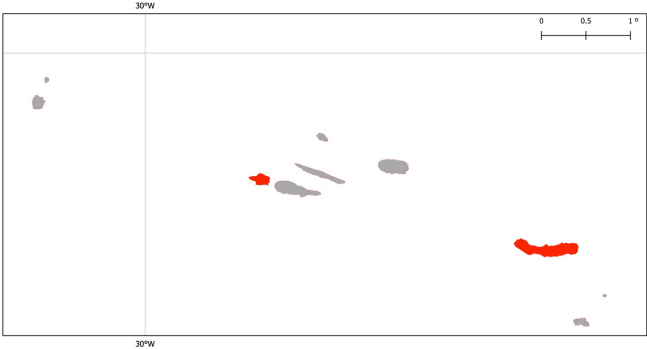

*Scinaia acuta*

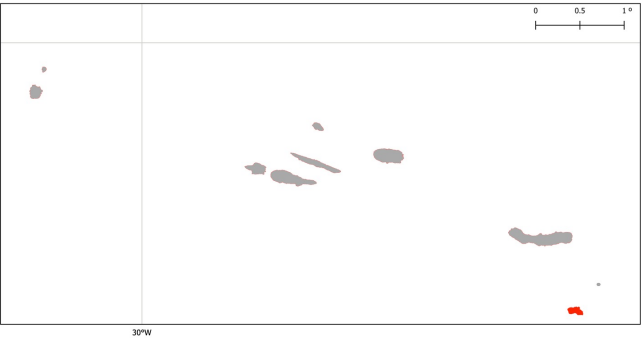

*Spongoclonium caribaeum*

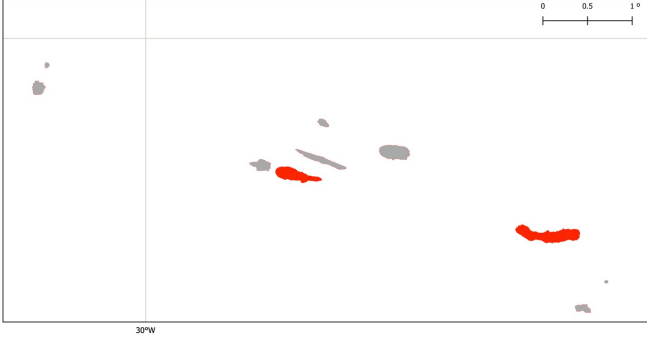

*Symphycladia marchantioides*

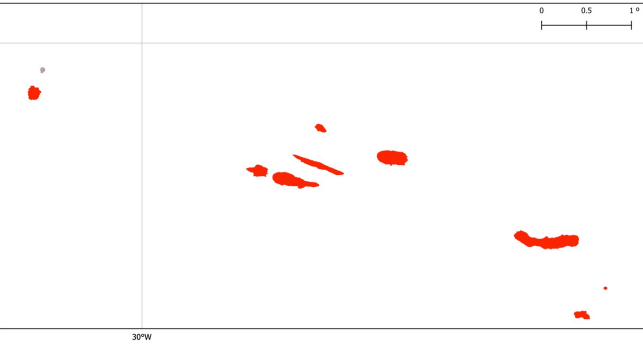

*Xiphosiphonia pennata*

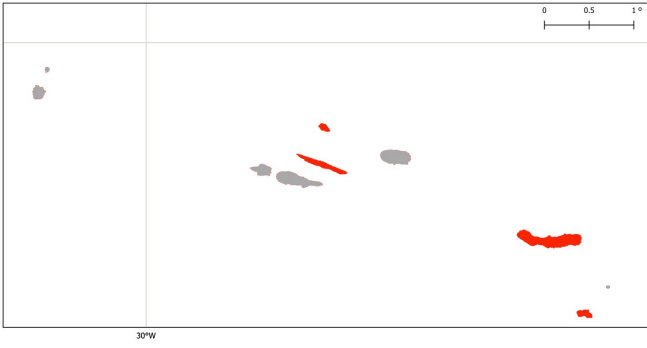

*Xiphosiphonia pinnulata*

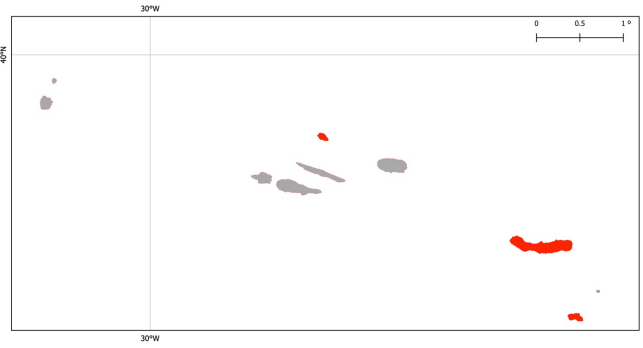

# Chlorophyta

*Caulerpa prolifera*

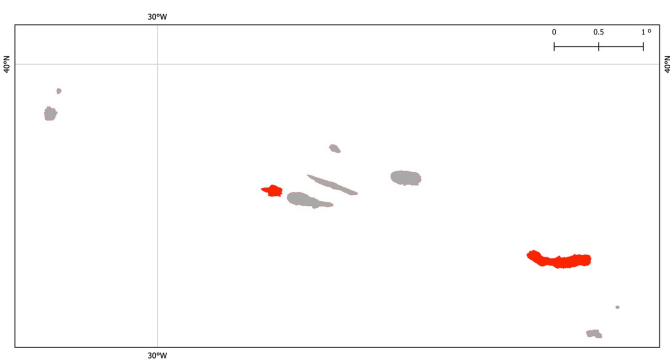

*Caulerpa webbiana*

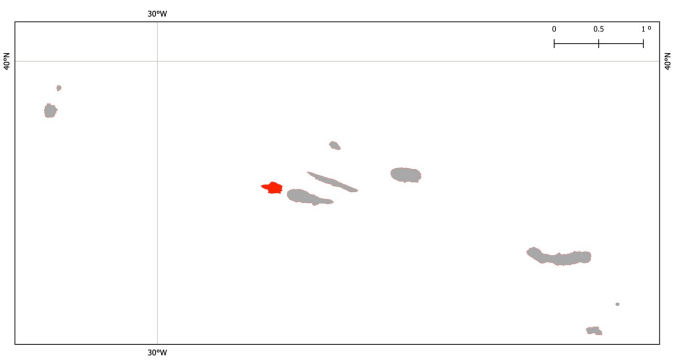

*Codium fragile*

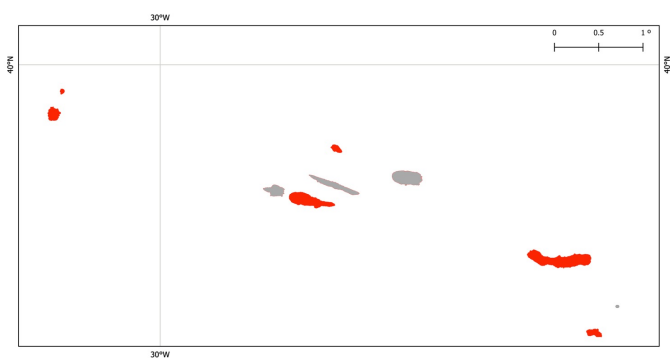

*Halimeda incrassata*

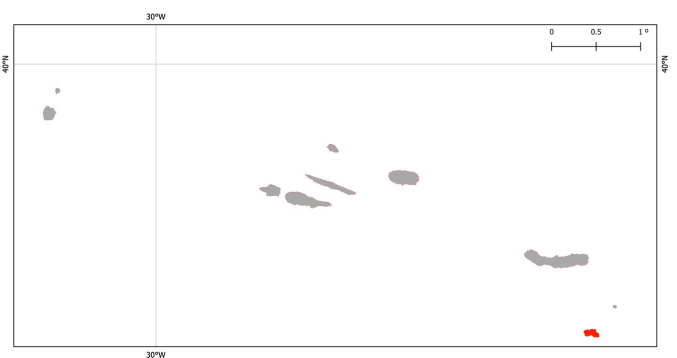

Supplement: s1 [file s1]
